# Supplementary material for: Targeting NLRP3 signaling with a novel sulfonylurea compound for the treatment of vascular cognitive impairment and dementia
Source: Research Square preprint supplement (doi:10.21203/rs.3.rs-5611378/v1), 2024-12-20

**Tables**

| Antibody | Host | Product details | Dilution |
| --- | --- | --- | --- |
| Fibrinogen | Mouse | Proteintech, Cat # 66158-1 | 1:100 |
| CD31 | Rat | BD Pharmingen, Cat # 55027 | 1:20 |
| Occludin | Mouse | Proteintech, Cat # 66378-1 | 1:50 |
| Claudin 5 | Rabbit | Invitrogen, Cat #34-1600 | 1:50 |
| MBP | Rat | Novus, Cat #NB600-717 | 1:100 |
| NeuN | Rabbit | Cell Signaling, Cat # 24307S | 1:100 |
| CD68 | Mouse | Invitrogen, Cat #MA5-16674 | 1:50 |
| NLRP3 | Rabbit | Novus, Cat #NBP2-12446 | 1:50 |
| NeuN | Mouse | Millipore Sigma, Cat #MAB377 | 1:50 |
| ASC | Rabbit | Cell Signaling, Cat #67824 | 1:100 |
| P-MST1 (Thr183) | Rabbit | Invitrogen Cat #PA5-4017**7** | 1:10 |

**Supplementary Table S1 List of primary antibodies used in immunostaining assays**

| Antibody | Host | Product details | Dilution |
| --- | --- | --- | --- |
| GAPDH | Rabbit | Cell Signaling, Cat # 2118 | 1:1000 |
| NLRP3 | Rabbit | Cell Signaling, Cat #15101 | 1:1000 |
| Occludin | Rabbit | Invitrogen, Cat # 40-4700 | 1:1000 |
| Claudin 5 | Rabbit | Invitrogen, Cat #34-1600 | 1:1000 |
| ASC | Rabbit | Cell Signaling, Cat # 67824 | 1:1000 |
| HSP90 | Rabbit | Cell Signaling, Cat # 4874 | 1:1000 |
| Pro-caspase-1 & cleaved caspase-1 | Rabbit | Proteintech, Cat #22915-1-AP | 1:1000 |
| P-MST1 (Thr183) | Rabbit | Invitrogen, Cat #PA5-4017**7** | 1:1000 |
| MST1 | Rabbit | Cell Signaling, Cat # 3682 | 1:1000 |

**Supplementary Table S2 List of Western blotting primary antibodies**

| Antibody | Anti | Product details | Dilution |
| --- | --- | --- | --- |
| Alexa Fluor® 488 | Rabbit | Cell Signaling, Cat # 4412 | 1:1000 |
| Alexa Fluor® 555 | Rabbit | Cell Signaling, Cat # 4413 | 1:1000 |
| Alexa Fluor® 555 | Mouse | Cell Signaling, Cat # 4409 | 1:1000 |
| Alexa Fluor® 488 | Mouse | Cell Signaling, Cat # 4408 | 1:1000 |
| Alexa Fluor® 488 | Rat | Cell Signaling, Cat # 4417 | 1:1000 |
| Alexa Fluor® 555 | Rat | Cell Signaling, Cat # 4418 | 1:1000 |

**Supplementary Table S3 List of secondary antibodies used in immunostaining assays**


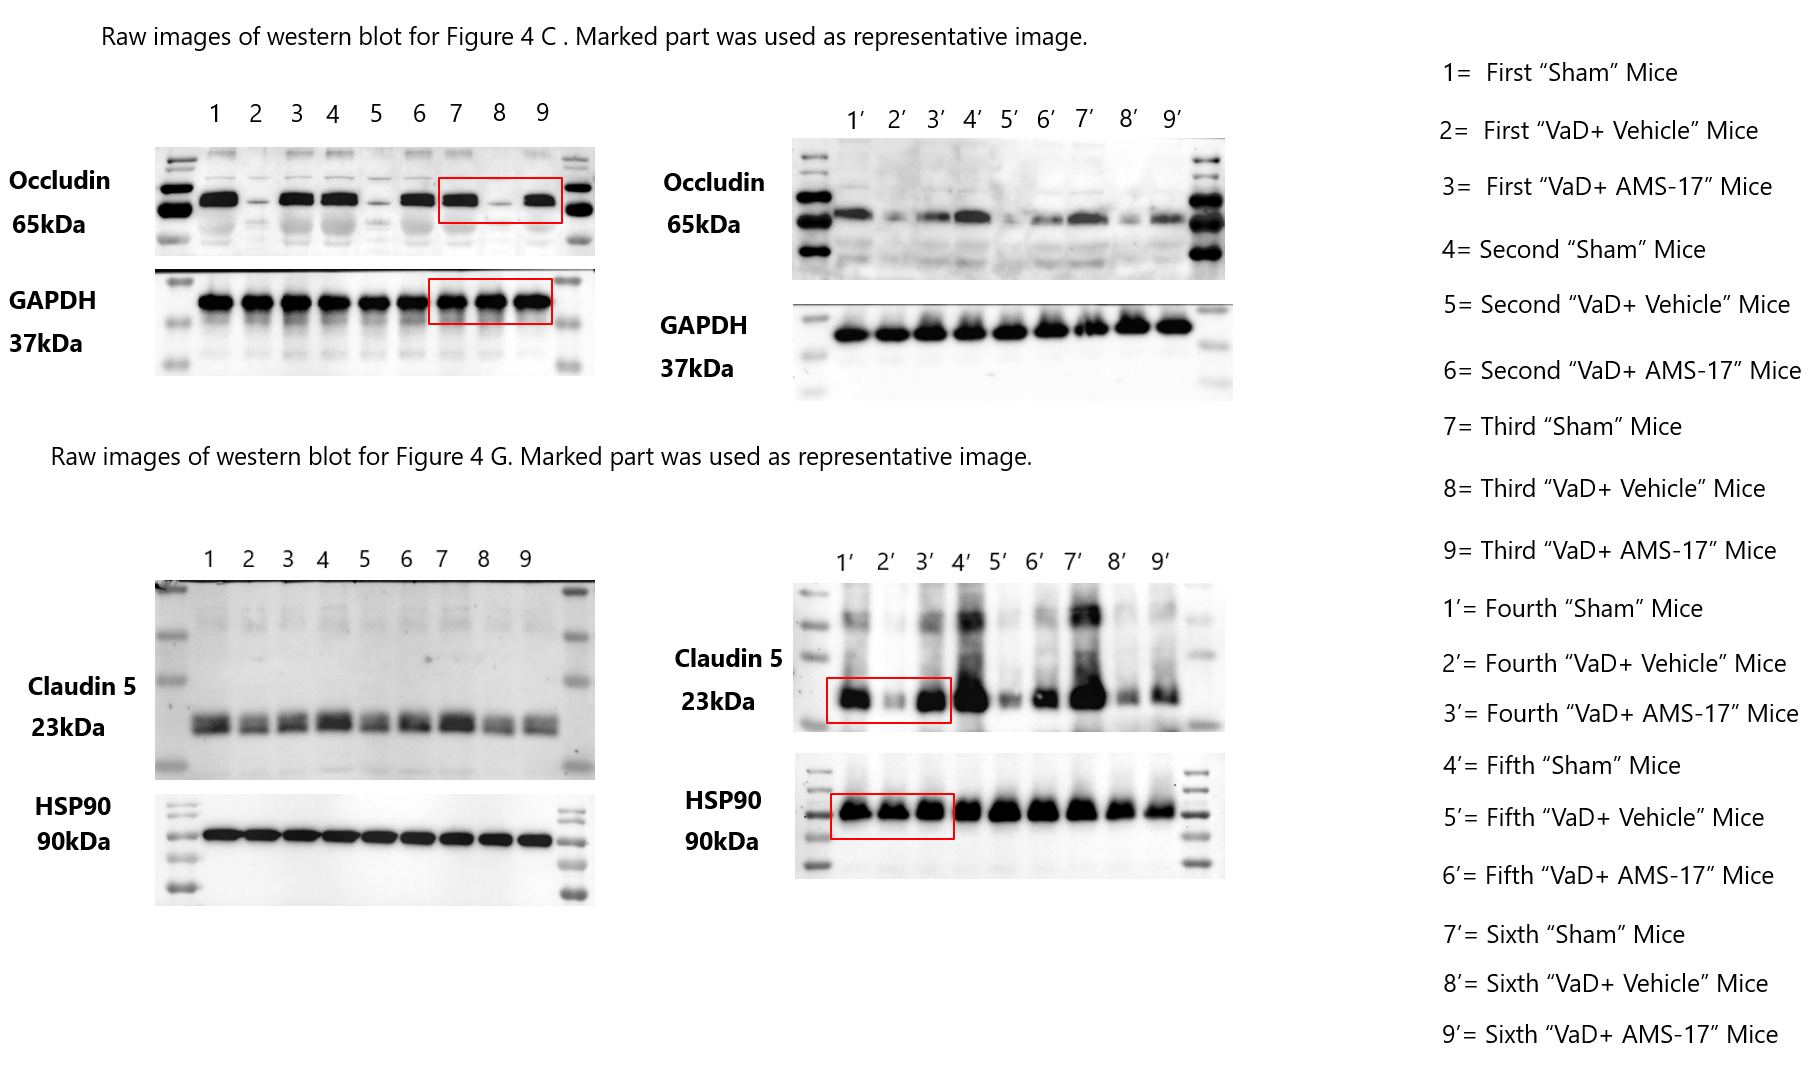


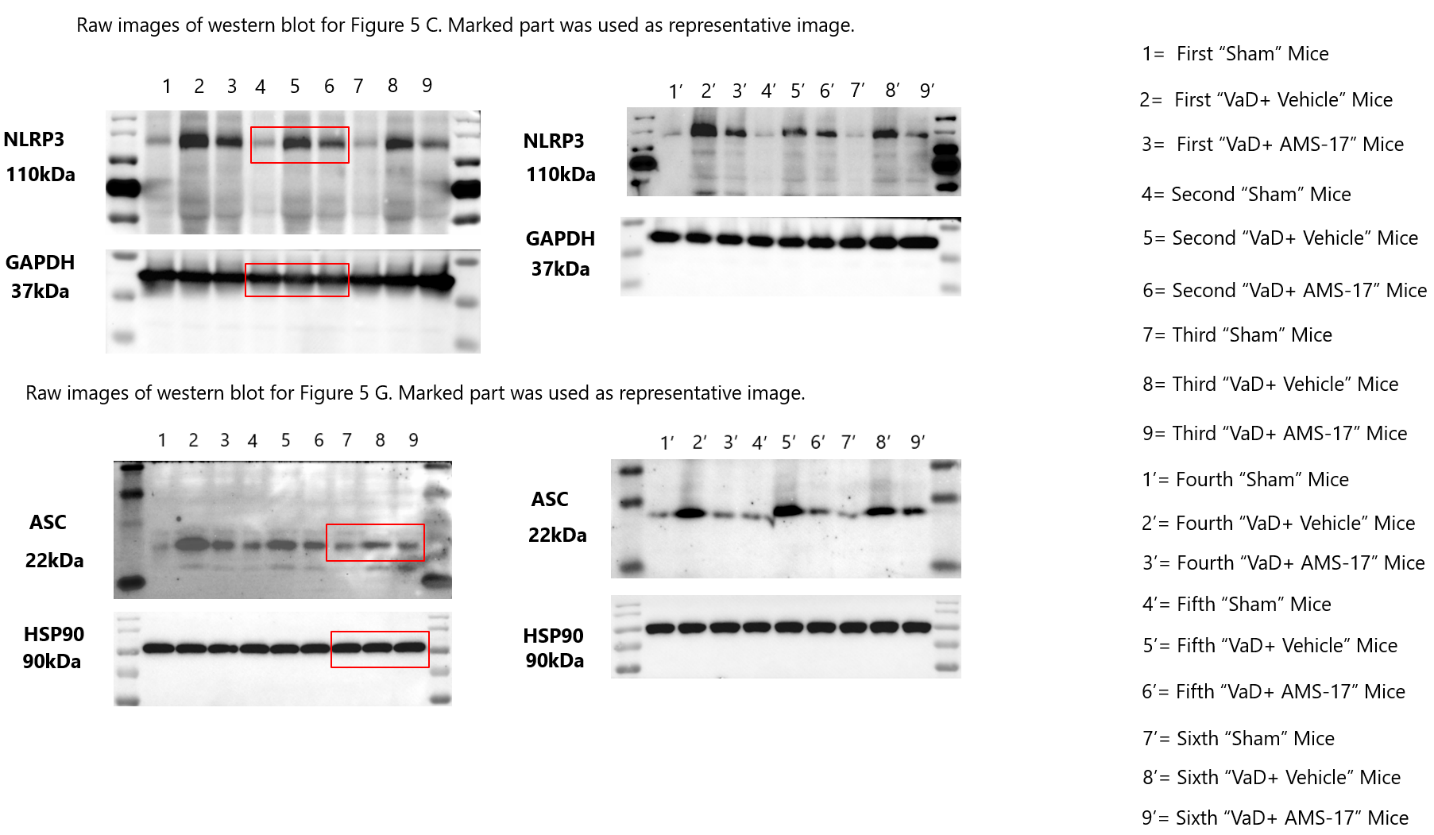


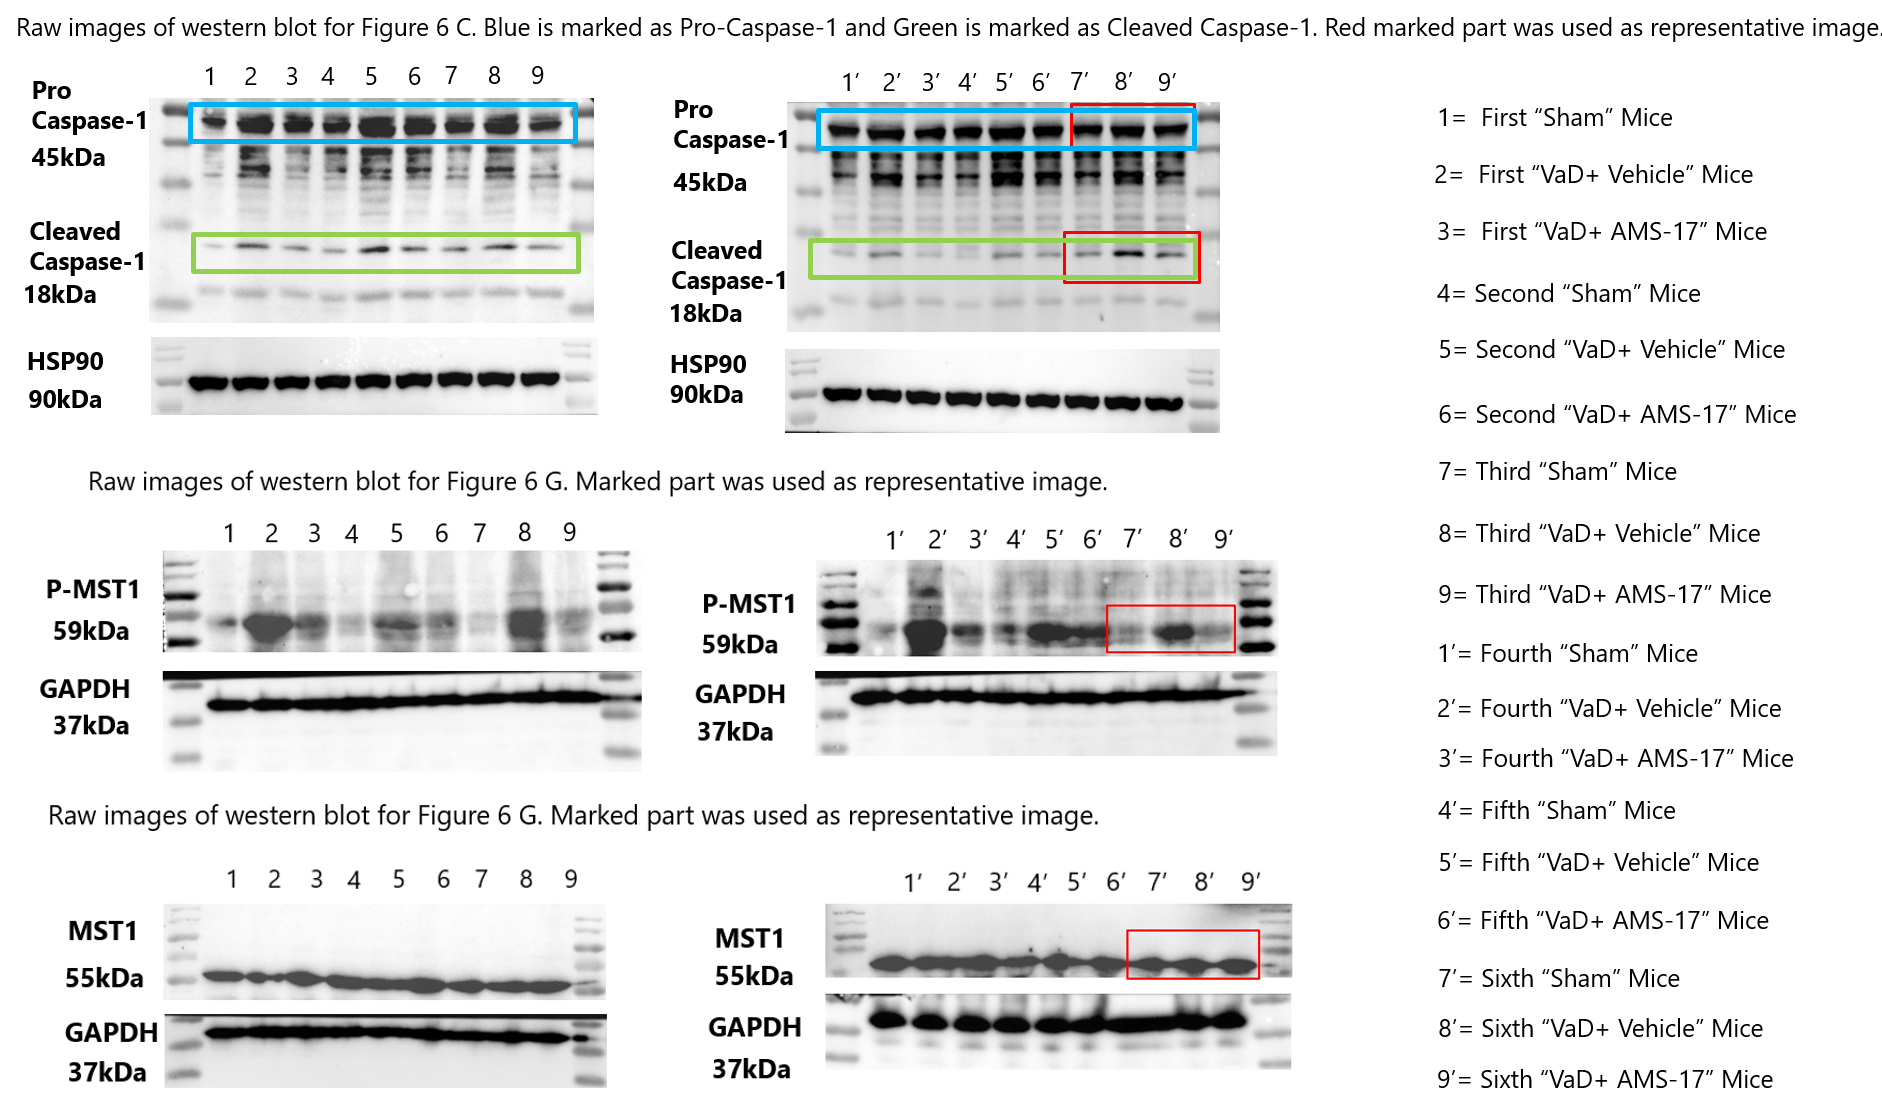

Supplement: Supplementary file 1 [file 391076ede6921cde6596ba51.docx]
